# Supplementary material for: Evaluation of a Group Therapy for Work-Related Mental Disorders
Source: MDPI journal article supplement (doi:10.3390/ijerph20032673), 2023-02-02
Supplement: s1 [file s1]

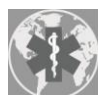

**Table S1.** Socio-demographic and occupational characteristics of the completer and intention to treat sample and group comparison.

|                                                | Completer<br>N = 48 | Intention to Treat<br>N = 71 | Comparison<br>Completer to ITT<br>p |
|------------------------------------------------|---------------------|------------------------------|-------------------------------------|
| <b>Gender, n (%)</b>                           |                     |                              | 0.47                                |
| Women                                          | 23 (47.9)           | 32 (45.1)                    |                                     |
| Men                                            | 25 (52.1)           | 39 (54.9)                    |                                     |
| <b>Age, years, n (%)</b>                       |                     |                              | 0.31                                |
| 26-40                                          | 8 (16.7)            | 17 (23.9)                    |                                     |
| 41-50                                          | 16 (33.3)           | 19 (26.8)                    |                                     |
| 51-60                                          | 24 (50)             | 35 (49.3)                    |                                     |
| <b>Marital status, n (%)</b>                   |                     |                              | 0.61                                |
| Single                                         | 11 (22.9)           | 18 (25.4)                    |                                     |
| Married                                        | 23 (47.9)           | 32 (45.1)                    |                                     |
| Widowed                                        | -                   | 1 (1.4)                      |                                     |
| Divorced                                       | 11 (22.9)           | 16 (22.5)                    |                                     |
| Seperated                                      | 2 (4.2)             | 3 (4.2)                      |                                     |
| Missing                                        | 1 (2.1)             | 1 (1.4)                      |                                     |
| <b>Children, n (%)</b>                         |                     |                              | 0.63                                |
| Yes                                            | 30 (62.5)           | 43 (60.6)                    |                                     |
| No                                             | 18 (37.5)           | 28 (39.4)                    |                                     |
| <b>Migration background, n (%)</b>             |                     |                              | 0.73                                |
| Yes                                            | 5 (10.4)            | 8 (11.3)                     |                                     |
| No                                             | 43 (89.6)           | 63 (88.7)                    |                                     |
| <b>Education, n (%)</b>                        |                     |                              | 0.06                                |
| Primary School                                 | 3 (6.3)             | 9 (12.7)                     |                                     |
| Middle School                                  | 19 (39.6)           | 25 (35.2)                    |                                     |
| Secondary school                               | 26 (54.2)           | 37 (52.1)                    |                                     |
| <b>Professional qualification, n (%)</b>       |                     |                              | 0.74                                |
| Apprenticeship                                 | 18 (37.5)           | 27 (28.0)                    |                                     |
| Master (craftsmen)                             | 7 (14.6)            | 8 (11.3)                     |                                     |
| University                                     | 19 (39.6)           | 27 (38.0)                    |                                     |
| None                                           | 1 (2.1)             | 1 (1.4)                      |                                     |
| Other                                          | 3 (6.3)             | 5 (7.0)                      |                                     |
| <b>Professional group, n (%)</b>               |                     |                              | 0.09                                |
| Skilled worker                                 | 2 (4.2)             | 6 (8.5)                      |                                     |
| Employee with simple tasks                     | 2 (4.2)             | 4 (5.6)                      |                                     |
| Employee with qualified tasks                  | 24 (50.0)           | 30 (42.3)                    |                                     |
| Employee with high qualified tasks/ leadership | 14 (29.2)           | 19 (26.8)                    |                                     |
| Employee in extensive leading position         | 5 (10.4)            | 8 (11.3)                     |                                     |
| Other                                          | 1 (2.1)             | 4 (5.6)                      |                                     |
| <b>Employment status, n (%)</b>                |                     |                              | 0.55                                |
| Full-time                                      | 36 (75.0)           | 51 (71.8)                    |                                     |
| Part-time                                      | 12 (25.0)           | 19 (26.8)                    |                                     |

**Table S2.** Number of ICD-10 coded mental and behavioral disorders of completer and intention to treat sample.

|                                                                                                 | Completer Sample<br>N = 48 | Intention to Treat<br>Sample<br>N=71 |
|-------------------------------------------------------------------------------------------------|----------------------------|--------------------------------------|
| <b>Number mental and behavioral disorders, n (%)</b>                                            |                            |                                      |
| One                                                                                             | 32 (66.7)                  | 45 (63.4)                            |
| Two                                                                                             | 12 (25.0)                  | 16 (22.5)                            |
| Three                                                                                           | 4 (8.3)                    | 6 (8.5)                              |
| Missing                                                                                         | -                          | 4 (5.6)                              |
| <b>Main psychiatric diagnoses, n (%)</b>                                                        |                            |                                      |
| <b>Mood affective disorders</b>                                                                 | 30 (62.5)                  | 40 (56.3)                            |
| Mild depressive episode                                                                         | 5 (10.4)                   | 6 (8.5)                              |
| Moderate depressive episode                                                                     | 10 (20.8)                  | 15 (21.1)                            |
| Recurrent depressive disorder, current episode mild                                             | 4 (8.3)                    | 6 (8.5)                              |
| Recurrent depressive disorder, current episode moderate                                         | 10 (20.8)                  | 12 (16.9)                            |
| Recurrent depressive disorder, current episode severe without psychotic symptoms                | 1 (2.1)                    | 1 (1.4)                              |
| <b>Neurotic, stress-related and somatoform disorders</b>                                        | 13 (56.3)                  | 22 (63.3)                            |
| Panic disorder                                                                                  | 1 (2.1)                    | 2 (2.8)                              |
| Generalized anxiety disorder                                                                    | 1 (2.1)                    | 3 (4.2)                              |
| Mixed anxiety and depressive disorder                                                           | 1 (2.1)                    | 1 (1.4)                              |
| Adjustment disorders                                                                            | 5 (10.4)                   | 7 (9.9)                              |
| Other reactions to severe stress                                                                | 2 (4.2)                    | 2 (2.8)                              |
| Undifferentiated somatoform disorder                                                            | 2 (4.2)                    | 3 (4.2)                              |
| Somatoform autonomic dysfunction                                                                | 1 (2.1)                    | 2 (2.8)                              |
| Persistent somatoform pain disorder                                                             | -                          | 1 (1.4)                              |
| <b>Behavioral syndromes associated with physiological disturbances and physical factors</b>     | 3 (6.3)                    | 3 (4.2)                              |
| Eating disorder, unspecified                                                                    | 1 (2.1)                    | 1 (1.4)                              |
| Psychological and behavioral factors associated with disorders or diseases classified elsewhere | 2 (4.2)                    | 2 (2.8)                              |
| <b>Disorders of adult personality and behavior</b>                                              | 2 (4.2)                    | 2 (2.8)                              |
| Other specified disorders of adult personality and behavior                                     | 2 (4.2)                    | 2 (2.8)                              |
| <b>Total psychiatric diagnoses, n (%)</b>                                                       |                            |                                      |
| Mood (affective) disorders                                                                      | 39 (60.9)                  | 55 (57.9)                            |
| Neurotic, stress-related and somatoform disorders                                               | 17 (26.5)                  | 29 (30.5)                            |
| Behavioral syndromes associated with physiological disturbances and physical factors            | 4 (6.3)                    | 7 (7.4)                              |
| Disorders of adult personality and behavior                                                     | 4 (6.3)                    | 4 (4.2)                              |

**Table S3.** Symptoms at admission and discharge.

|                | T1                                  |                               |                                    |                              |                                  |                               |
|----------------|-------------------------------------|-------------------------------|------------------------------------|------------------------------|----------------------------------|-------------------------------|
|                | Completer<br>Sample (N=48)<br>M(SD) | ITT Sample<br>(N=71)<br>M(SD) | Completer<br>Women (n=23)<br>M(SD) | ITT<br>Women (n=32)<br>M(SD) | Completer Men<br>(n=25)<br>M(SD) | ITT<br>Men<br>(n=39)<br>M(SD) |
| <b>PHQ-15</b>  | 10.81 (5.61)                        | 11.7 (5.8)                    | 12.74 (5.43)                       | 14.47 (5.98)                 | 9.04 (5.27)                      | 9.44 (4.63)                   |
| <b>PHQ-15*</b> | 10.73 (5.56)                        | 11.44 (5.56)                  | 12.57 (5.38)                       | 13.91 (5.68)                 | 9.04 (5.27)                      | 7.62 (4.08)                   |
| <b>PHQ-9</b>   | 11.06 (6.19)                        | 11.03 (5.4)                   | 12.25 (5.97)                       | 11.88 (5.40)                 | 9.96 (5.50)                      | 10.33 (5.35)                  |

|               |             |            |              |             |             |             |
|---------------|-------------|------------|--------------|-------------|-------------|-------------|
| <b>GAD-7</b>  | 9.94 (5.18) | 8.55 (4.7) | 10.74 (4.85) | 9.56 (4.70) | 9.20 (5.45) | 7.72 (4.66) |
| <b>MBI EE</b> | 4.63 (.95)  | 4.7 (.94)  | 4.87 (.77)   | 5.00 (.75)  | 4.42 (1.07) | 4.50 (1.02) |
| <b>MBI Z</b>  | 3.93 (.99)  | 4.0 (.99)  | 4.00 (.86)   | 4.02 (8.3)  | 3.86 (1.11) | 3.98 (1.11) |
| <b>MBI PF</b> | 4.30 (.83)  | 4.3 (.75)  | 4.31 (.74)   | 4.23 (.70)  | 4.27 (.93)  | 4.36 (.80)  |

**T2**

|                | <b>Completer<br/>Sample (N=48)<br/>M(SD)</b> | <b>ITT Sample<br/>(N=71)<br/>M(SD)</b> | <b>Completer<br/>Women (n=23)<br/>M(SD)</b> | <b>ITT<br/>Women (n=32)<br/>M(SD)</b> | <b>Completer Men<br/>(n=25)<br/>M(SD)</b> | <b>ITT<br/>Men<br/>(n=39)<br/>M(SD)</b> |
|----------------|----------------------------------------------|----------------------------------------|---------------------------------------------|---------------------------------------|-------------------------------------------|-----------------------------------------|
| <b>PHQ-15</b>  | 9.85 (6.19)                                  | 10.99 (6.26)                           | 10.30 (5.80)                                | 12.59 (6.76)                          | 9.44 (6.62)                               | 9.44 (4.63)                             |
| <b>PHQ-15*</b> | 9.73 (6.12)                                  | 10.76 (6.03)                           | 10.04 (5.67)                                | 12.09 (6.39)                          | 9.44 (6.62)                               | 9.44 (4.63)                             |
| <b>PHQ-9</b>   | 8.29 (6.27)                                  | 9.15 (5.88)                            | 8.17 (5.75)                                 | 8.94 (5.33)                           | 8.40 (6.83)                               | 9.33 (6.35)                             |
| <b>GAD-7</b>   | 7.13 (5.69)                                  | 7.70 (5.46)                            | 6.17 (4.50)                                 | 7.47 (5.16)                           | 8.00 (6.57)                               | 7.9 (5.75)                              |
| <b>MBI EE</b>  | 4.05 (1.35)                                  | 4.33 (1.28)                            | 4.14 (1.16)                                 | 4.48 (1.15)                           | 3.97 (1.52)                               | 4.2 (1.38)                              |
| <b>MBI Z</b>   | 3.70 (1.32)                                  | 3.85 (1.23)                            | 3.70 (1.19)                                 | 3.68 (1.13)                           | 3.72 (1.44)                               | 4.00 (1.30)                             |
| <b>MBI PF</b>  | 4.41 (.94)                                   | 4.38 (.83)                             | 4.62 (.71)                                  | 4.45 (.72)                            | 4.23 (1.09)                               | 4.32 (.92)                              |

PHQ-15 (Patient Health Questionnaire Somatization Module);\* without Menstruation Item; PHQ-9 (Patient Health Questionnaire Depression Module); GAD-7 (General Anxiety Disorder Short Scale); Varying sample sizes; significant p-values are marked in bold.

**Table S4.** Symptom change of the total sample, women, men.

|                | <b>Completer Sample<br/>T1-T2</b> |                |             | <b>Completer Women<br/>T1-T2</b> |                |              | <b>Completer Men<br/>T1-T2</b> |               |             |
|----------------|-----------------------------------|----------------|-------------|----------------------------------|----------------|--------------|--------------------------------|---------------|-------------|
|                | <b>T</b>                          | <b>p</b>       | <b>d</b>    | <b>T</b>                         | <b>p</b>       | <b>d</b>     | <b>T</b>                       | <b>p</b>      | <b>d</b>    |
| <b>PHQ-15</b>  | 1.57                              | 0.12           | 0.23        | 3.65                             | <.001          | <b>0.76</b>  | -0.43                          | 0.67          | -0.09       |
| <b>PHQ-15*</b> | 1.61                              | 0.11           | 0.23        | 3.59                             | <.05           | <b>0.75</b>  | -0.43                          | 0.67          | -0.09       |
| <b>PHQ-9</b>   | 3.6                               | <.001          | <b>0.53</b> | 4.62                             | <.001          | <b>0.96</b>  | 1.32                           | 0.20          | 0.26        |
| <b>GAD-7</b>   | 3.4                               | <b>0.001</b>   | <b>0.49</b> | 4.36                             | <.001          | <b>0.91</b>  | 1.02                           | 0.32          | 0.20        |
| <b>MBI EE</b>  | 3.8                               | <.001          | <b>0.55</b> | 3.26                             | <.05           | <b>0.68</b>  | 2.13                           | < <b>0.05</b> | <b>0.43</b> |
| <b>MBI C</b>   | 1.50                              | 0.14           | 0.22        | 1.51                             | .15            | 0.32         | 0.65                           | 0.52          | 0.13        |
| <b>MBI PF</b>  | -1.20                             | 0.24           | -0.17       | -2.70                            | <.05           | <b>-0.56</b> | 0.41                           | 0.68          | 0.08        |
|                | <b>ITT Sample<br/>T1-T2</b>       |                |             | <b>ITT Women<br/>T1-T2</b>       |                |              | <b>ITT Men<br/>T1-T2</b>       |               |             |
|                | <b>T</b>                          | <b>p</b>       | <b>d</b>    | <b>T</b>                         | <b>p</b>       | <b>d</b>     | <b>T</b>                       | <b>p</b>      | <b>d</b>    |
| <b>PHQ-15</b>  | 1.64                              | 0.10           | 0.20        | 3.21                             | < <b>0.05</b>  | <b>0.57</b>  | -0.39                          | 0.70          | -0.06       |
| <b>PHQ-15*</b> | 1.53                              | 0.12           | 0.19        | 3.21                             | < <b>0.05</b>  | <b>0.57</b>  | -0.39                          | 0.70          | -0.06       |
| <b>PHQ-9</b>   | 3.49                              | < <b>0.001</b> | <b>0.41</b> | 4.12                             | < <b>0.001</b> | <b>0.73</b>  | 2.54                           | 0.20          | 0.21        |
| <b>GAD-7</b>   | 1.59                              | 0.12           | 0.19        | 2.84                             | < <b>0.05</b>  | <b>0.50</b>  | 1.28                           | 0.81          | -0.40       |
| <b>MBI EE</b>  | 3.61                              | < <b>0.001</b> | <b>0.43</b> | 3.03                             | < <b>0.05</b>  | <b>0.54</b>  | 0.57                           | < <b>0.05</b> | <b>0.33</b> |
| <b>MBI C</b>   | .82                               | 0.42           | 0.10        | 1.56                             | 0.13           | 0.28         | 0.51                           | 0.94          | -0.01       |
| <b>MBI PF</b>  | -1.20                             | 0.24           | -0.14       | -2.60                            | < <b>0.05</b>  | <b>-0.46</b> | 0.23                           | 0.68          | 0.07        |

PHQ-15 (Patient Health Questionnaire Somatization Module);\* without Menstruation Item; PHQ-9 (Patient Health Questionnaire Depression Module); GAD-7 (General Anxiety Disorder Short Scale); Varying sample sizes; significant p-values are marked in bold.
